# Supplementary material for: Dietary Energy Levels Affect Carbohydrate Metabolism-Related Bacteria and Improve Meat Quality in the Longissimus Thoracis Muscle of Yak (Bos grunniens)
Source: Front Vet Sci. 2021 Sep 22;8:718036. doi: 10.3389/fvets.2021.718036 (PMC8492897; doi:10.3389/fvets.2021.718036)
Supplement: Supplementary file 2 [file Table_2.XLSX]

## Sheet: GreenGene Database
Taxonomy	LE1	LE2	LE3	LE4	LE5	ME1	ME2	ME3	ME4	ME5	HE1	HE2	HE3	HE4	HE5
Others	0.377493	0.383834	0.330928	0.38298	0.318716	0.28859	0.282676	0.320061	0.38757	0.306183	0.306824	0.346236	0.361843	0.355011	0.325163
Christensenellaceae_R-7_group	0.0914428	0.112622	0.100581	0.0914855	0.205389	0.125603	0.153316	0.100687	0.107178	0.153465	0.156198	0.197703	0.0783979	0.104509	0.0832871
Prevotella_1	0.0272215	0.0306375	0.0563218	0.0378752	0.0226312	0.057859	0.0239122	0.0170161	0.0209445	0.024446	0.0782911	0.0334771	0.0679149	0.0303813	0.129211
Rikenellaceae_RC9_gut_group	0.162902	0.122998	0.08365	0.126948	0.0724412	0.172339	0.122251	0.136001	0.116786	0.115483	0.0708613	0.0864896	0.0753448	0.0992784	0.075174
SP3-e08	0.0248943	0.0232504	0.0296768	0.0424015	0.0562577	0.0195995	0.0482301	0.0374696	0.0479098	0.0136214	0.0459029	0.0352492	0.0277766	0.048593	0.0223963
Ruminococcaceae_NK4A214_group	0.0686622	0.0605491	0.0247449	0.0570904	0.0794013	0.046394	0.0702848	0.0959477	0.0582006	0.0906529	0.0409497	0.0464153	0.0740424	0.066762	0.0579017
Lachnospiraceae_XPB1014_group	0.0150732	0.00873223	0.00794227	0.01012	0.00926598	0.0146462	0.0128528	0.00986379	0.00772877	0.0168239	0.0318758	0.00894573	0.00704556	0.0122123	0.00785687
Saccharofermentans	0.0136001	0.0278833	0.0163756	0.0125326	0.011038	0.0172937	0.015671	0.0185533	0.0228233	0.0227806	0.0301038	0.0156283	0.0127674	0.014326	0.0121483
Prevotellaceae_UCG-003	0.0195781	0.0140271	0.0230369	0.0212861	0.0182758	0.0381101	0.0552329	0.0329006	0.0310432	0.0179128	0.0184466	0.018959	0.0266877	0.0463086	0.0297408
Erysipelotrichaceae_UCG-004	0.0117853	0.0127034	0.00681071	0.0202186	0.0190871	0.0059567	0.0215423	0.012255	0.00879628	0.0121056	0.0175926	0.00745121	0.0317904	0.00999189	0.0219693
Victivallis	0.00307443	0.00275417	0.00668261	0.00484649	0.00298903	0.00775012	0.00636236	0.00725906	0.00269012	0.00333063	0.0132585	0.005487	0.00732311	0.0128742	0.00512404
Ruminococcaceae_UCG-010	0.0194714	0.0172082	0.0153081	0.0174004	0.0233571	0.0203894	0.0222896	0.0201332	0.0223963	0.0222255	0.0123191	0.0173791	0.0155856	0.0219693	0.0139203
[Eubacterium]_ruminantium_group	0.00348008	0.005487	0.00529485	0.00390708	0.00394978	0.00471839	0.00394978	0.00365088	0.00469704	0.00572185	0.0117853	0.00640506	0.0238055	0.00779282	0.00345873
Ruminococcaceae_UCG-014	0.0133652	0.0191511	0.0058286	0.0110594	0.0225885	0.0200692	0.0119348	0.0155216	0.0136641	0.0298262	0.00988514	0.0189376	0.00798497	0.0155856	0.0105256
Papillibacter	0.00636236	0.00792092	0.0111875	0.00845467	0.00930868	0.00796362	0.00794227	0.00792092	0.0101413	0.00979974	0.00967163	0.0117426	0.00450489	0.00856142	0.0184466
Pseudobutyrivibrio	0.00811307	0.00343738	0.0118494	0.00471839	0.00258337	0.00337333	0.00371493	0.00384303	0.00264742	0.00538025	0.00933003	0.00369358	0.00281822	0.00473974	0.00448354
Butyrivibrio_2	0.00794227	0.0109526	0.00584995	0.0107178	0.00602075	0.0102481	0.00999189	0.0057432	0.00879628	0.0133439	0.00909518	0.00783552	0.00352278	0.00636236	0.0057005
Ruminococcaceae_UCG-002	0.0189803	0.0202827	0.00397113	0.0100132	0.00777147	0.011828	0.0116359	0.0138349	0.0113583	0.00792092	0.00900978	0.00661856	0.0183185	0.00567915	0.00868953
Prevotellaceae_UCG-001	0.00335198	0.00333063	0.0168666	0.00333063	0.00211367	0.00320253	0.00294633	0.00294633	0.00211367	0.00269012	0.00875358	0.00266877	0.00309578	0.00202827	0.00768607
Treponema_2	0.00153721	0.00157991	0.00382168	0.00311713	0.00117426	0.00213502	0.00283957	0.00646911	0.00254067	0.00209232	0.00794227	0.00211367	0.00804902	0.00281822	0.00303173
Ruminococcus_1	0.00672531	0.00666126	0.00343738	0.00623425	0.00674666	0.00866818	0.00757932	0.0058286	0.00734446	0.0169093	0.00725906	0.0055724	0.0059994	0.00627695	0.00760067
Lachnospiraceae_ND3007_group	0.0112088	0.00941543	0.00358683	0.0051881	0.00341603	0.00444084	0.00888168	0.00437679	0.00441949	0.00452624	0.00710961	0.00320253	0.00269012	0.00277552	0.00307443
[Eubacterium]_coprostanoligenes_group	0.0112729	0.0162475	0.00781417	0.0128528	0.0225031	0.0171015	0.0126607	0.0138136	0.0171228	0.0134079	0.00706691	0.0209445	0.00962893	0.00890303	0.0142833
probable_genus_10	0.00392843	0.00418464	0.00204962	0.00471839	0.00450489	0.00407789	0.00290363	0.00260472	0.00234852	0.00473974	0.00698151	0.00292498	0.00315983	0.00377898	0.00429139
Fibrobacter	0.00386438	0.00365088	0.0136214	0.00454759	0.00397113	0.00821982	0.00755797	0.0108886	0.00437679	0.00145181	0.0060848	0.00281822	0.00307443	0.00589265	0.00555105
Ruminococcaceae_UCG-013	0.00273282	0.00623425	0.00277552	0.00392843	0.00384303	0.00416329	0.00377898	0.00279687	0.00452624	0.00439814	0.00550835	0.0058286	0.00779282	0.00939408	0.00550835
Lachnospiraceae_AC2044_group	0.00409924	0.00213502	0.00463299	0.00909518	0.00546565	0.00903113	0.00538025	0.0055724	0.00399248	0.00403519	0.00514539	0.00454759	0.00164396	0.00636236	0.00219907
Thalassospira	0.00130236	0.00217772	0.00147316	0.00106751	0.00117426	0.00292498	0.00132371	0.00384303	0.00125966	0.000982109	0.00420599	0.00132371	0.00371493	0.00136641	0.000832657
Ruminococcaceae_UCG-005	0.00313848	0.00362953	0.00488919	0.0057859	0.00429139	0.00424869	0.00362953	0.00269012	0.00789957	0.00674666	0.00341603	0.00898843	0.00371493	0.00567915	0.0102481
Anaerovorax	0.00858277	0.00493189	0.00326658	0.00655451	0.00488919	0.00435544	0.0058713	0.00871088	0.0053589	0.0062129	0.00337333	0.00405654	0.00392843	0.00538025	0.00418464
U29-B03	0.00175072	0.00160126	0.000939408	0.00183612	0.00121696	0.00685341	0.00290363	0.00356548	0.00251932	0.00125966	0.00215637	0.00322388	0.0293138	0.0157991	0.0163115
Ruminiclostridium_5	0.00138776	0.00166531	0.000512404	0.000896708	0.00128101	0.00215637	0.00175072	0.00130236	0.00207097	0.00318118	0.00211367	0.00343738	0.00151586	0.00202827	0.00271147
Lachnospiraceae_NK3A20_group	0.00198557	0.00200692	0.00153721	0.00313848	0.00181477	0.00196422	0.00209232	0.00234852	0.00172937	0.00403519	0.00207097	0.00215637	0.00303173	0.00224177	0.00277552
Family_XIII_AD3011_group	0.0052308	0.00362953	0.00168666	0.00450489	0.00350143	0.00241257	0.00636236	0.00418464	0.00348008	0.00309578	0.00177207	0.00296768	0.00147316	0.00444084	0.00185747
Anaeroplasma	0.00143046	0.00108886	0.000576455	0.000918058	0.000768607	0.00213502	0.00115291	0.00204962	0.000982109	0.00121696	0.00170801	0.00121696	0.000661856	0.00106751	0.000811307
Succiniclasticum	0.00100346	0.00123831	0.00292498	0.00503864	0.00140911	0.00145181	0.00266877	0.00367223	0.00140911	0.00168666	0.00162261	0.000918058	0.0055297	0.00130236	0.0102054
Ruminococcus_2	0.00202827	0.00313848	0.00286092	0.00200692	0.00301038	0.00232717	0.00175072	0.00130236	0.00281822	0.00717366	0.00157991	0.00747257	0.00424869	0.00183612	0.0127674
unidentified_Anaerolineaceae	0.000555105	0.000491054	0.000619155	0.0112729	0.000384303	0.000405654	0.000362953	0.000597805	0.000576455	0.000298903	0.00157991	0.000298903	0.00130236	0.000405654	0.0103335
Ruminobacter	0.000469704	0.000277552	0.000170801	0.000683206	0.00143046	0.00117426	0.00123831	0.00119561	0.000896708	0.000512404	0.00123831	0.000832657	0.000491054	0.00266877	0.00228447
Lachnospiraceae_NK4A136_group	0.000725906	0.000298903	0.000128101	0.000170801	0.000320253	0.000384303	0.000832657	0.000234852	0.000320253	0.000832657	0.00121696	0.000448354	0.000597805	0.000427004	0.000725906
Lachnospiraceae_UCG-009	0.000491054	0.00100346	0.000661856	0.000939408	0.000725906	0.00260472	0.000768607	0.000683206	0.000939408	0.000725906	0.00119561	0.00113156	0.000256202	0.00138776	0.000298903
Mogibacterium	0.00147316	0.00192152	0.00183612	0.00345873	0.00104616	0.00155856	0.00204962	0.00232717	0.00111021	0.00162261	0.00117426	0.00115291	0.00286092	0.00170801	0.000939408
Ruminococcaceae_UCG-012	0.000811307	0.000555105	0.000512404	0.00155856	0.000918058	0.00179342	0.000640506	0.000555105	0.00100346	0.000704556	0.00117426	0.00192152	0.00125966	0.00183612	0.00106751
Candidatus_Hepatincola	0.00115291	0.000939408	0.000661856	0.000854007	0.00397113	0.00147316	0.000725906	0.00649046	0.00177207	0.00155856	0.00113156	0.00222042	0.000491054	0.00121696	0.000854007
Atopostipes	0.000170801	6.40506e-05	8.54007e-05	4.27004e-05	8.54007e-05	6.40506e-05	6.40506e-05	8.54007e-05	4.27004e-05	0.000106751	0.00108886	0.000256202	0.000128101	8.54007e-05	8.54007e-05
[Eubacterium]_nodatum_group	0.00194287	0.00330928	0.00469704	0.00187882	0.00164396	0.00151586	0.00155856	0.00281822	0.00149451	0.00345873	0.00104616	0.00207097	0.00130236	0.00350143	0.000982109
Moryella	0.00132371	0.00136641	0.000341603	0.000533755	0.000362953	0.000512404	0.000683206	0.000661856	0.000747257	0.00149451	0.00104616	0.000469704	0.00119561	0.00134506	0.00134506
Lachnospiraceae_FCS020_group	0.000469704	0.000362953	0.00147316	0.000427004	0.000427004	0.000533755	0.000789957	0.000469704	0.000789957	0.000362953	0.000982109	0.000832657	0.000170801	0.000469704	0.000512404
Ruminiclostridium_9	0.000469704	0.000576455	0.000362953	0.000811307	0.000619155	0.000640506	0.000661856	0.000298903	0.00627695	0.00219907	0.000939408	0.00102481	0.000512404	0.000811307	0.000512404
Sphaerochaeta	0.000192152	0.000789957	0.00102481	0.000704556	0.000448354	0.000555105	0.000491054	0.000448354	0.000384303	0.000619155	0.000939408	0.000298903	0.000512404	0.000362953	0.000597805
[Anaerorhabdus]_furcosa_group	0.00143046	0.00108886	0.000277552	0.000854007	0.00170801	0.00125966	0.00143046	0.00213502	0.00104616	0.00128101	0.000789957	0.00140911	0.00275417	0.00115291	0.00198557
Lachnospiraceae_UCG-002	0.00100346	0.000918058	0.00106751	0.000854007	0.000661856	0.000832657	0.000982109	0.000854007	0.000960758	0.00113156	0.000747257	0.000640506	0.000832657	0.00104616	0.000875358
Succinivibrionaceae_UCG-002	0.000918058	0.000597805	0.000619155	0.000362953	0.000405654	0.00286092	0.000405654	0.000533755	0.000384303	0.00354413	0.000683206	0.00672531	0.00170801	0.000469704	0.000875358
Quinella	8.54007e-05	6.40506e-05	0.000106751	0.000555105	0.000149451	0.000597805	0.000128101	0.000128101	0.000213502	0.000320253	0.000640506	4.27004e-05	0.000106751	0.000234852	0.00123831
Lachnoclostridium_10	0.00121696	0.000405654	0.000277552	0.000832657	0.00119561	0.00266877	0.000811307	0.0106324	0.00155856	0.000683206	0.000619155	0.000725906	0.000320253	0.000597805	0.000555105
Phocaeicola	0	2.13502e-05	0.000362953	0.000106751	0.000149451	0.000106751	0.000106751	0.00111021	4.27004e-05	4.27004e-05	0.000597805	0.000341603	0.00350143	0.000405654	0.000640506
Lachnospiraceae_UCG-010	0.000939408	0.000939408	0.00256202	0.000747257	0.000918058	0.000619155	0.00104616	0.000854007	0.000789957	0.000960758	0.000576455	0.000960758	0.000811307	0.000704556	0.000619155
Lachnoclostridium_1	0.000491054	0.000384303	0.000298903	0.000405654	0.000213502	0.000277552	0.000491054	0.000619155	0.000448354	0.000277552	0.000555105	0.000149451	0.00213502	0.000362953	0.000661856
possible_genus_Sk018	0.000128101	0.000128101	0.000854007	0.000256202	6.40506e-05	0.000362953	0.000149451	0.000128101	0.000192152	0.000341603	0.000555105	0.000192152	0.000170801	4.27004e-05	0.000277552
Anaerotruncus	0.000448354	0.000298903	0.000555105	0.000277552	0.000362953	0.000192152	0.000491054	0.000256202	0.000405654	0.000661856	0.000533755	0.000469704	0.000747257	0.000448354	0.000747257
Psychrobacter	4.27004e-05	6.40506e-05	4.27004e-05	0	6.40506e-05	8.54007e-05	0.000128101	0.000149451	8.54007e-05	0.000170801	0.000533755	6.40506e-05	0.000234852	0.000640506	8.54007e-05
[Eubacterium]_ventriosum_group	0.000619155	0.000213502	0.000512404	0.000149451	0.000384303	0.00104616	0.000427004	0.000661856	0.000469704	0.000619155	0.000491054	0.00145181	0.00401383	0.000320253	0.000747257
Prevotellaceae_UCG-004	0.000405654	0.000234852	0.00102481	0.000405654	0.000341603	0.000384303	0.000491054	0.00185747	0.00125966	0.000320253	0.000491054	0.000320253	0.000854007	0.0057005	0.00108886
Desulfovibrio	0.000512404	0.000405654	0.000491054	0.000512404	0.000362953	0.000448354	0.000683206	0.000704556	0.000341603	0.000384303	0.000469704	0.000320253	0.000619155	0.000277552	0.000576455
Oribacterium	0.000512404	0.000704556	0.000362953	0.000619155	0.000491054	0.000384303	0.000384303	0.000192152	0.000234852	0.000768607	0.000469704	0.000533755	0.000597805	0.000576455	0.000661856
Candidatus_Saccharimonas	0.000149451	0.000939408	0.000747257	0.000854007	0.00113156	0.000982109	0.00132371	0.000362953	0.000576455	0.00172937	0.000427004	0.00108886	0.000918058	0.000768607	0.000768607
Roseburia	0.000277552	0.000277552	0.00563645	0.000362953	0.000341603	0.000298903	0.000512404	0.000192152	0.000298903	0.000277552	0.000427004	0.000960758	0.000128101	0.000213502	0.000149451
unidentified_Gastranaerophilales	0.000106751	0.000256202	6.40506e-05	0.000170801	0.000128101	0.000491054	0.000170801	0.000106751	0.000170801	6.40506e-05	0.000405654	0	0.00459029	8.54007e-05	0.000106751
Elusimicrobium	0.000170801	0.000341603	0.000384303	0.000661856	0.000320253	0.000277552	0.00100346	0.000918058	0.000320253	0.000427004	0.000384303	0.000341603	0.00401383	0.000128101	0.000149451
Acetitomaculum	0.000704556	0.000747257	0.000192152	0.000875358	0.000277552	0.000533755	0.000640506	0.000661856	0.000320253	0.000875358	0.000341603	0.000362953	0.000213502	0.000234852	0.000491054
Defluviitaleaceae_UCG-011	0.000533755	0.000640506	0.000512404	0.000533755	0.000747257	0.000555105	0.000896708	0.00196422	0.000832657	0.000725906	0.000320253	0.000533755	0.000341603	0.00100346	0.000341603
Family_XIII_UCG-002	0.000576455	0.000683206	0.000384303	0.000854007	0.000661856	0.000683206	0.000491054	0.000811307	0.000619155	0.000661856	0.000320253	0.000854007	0.000384303	0.000704556	0.000277552
Selenomonas_1	0.000448354	0.00168666	0.000298903	0.000341603	0.000170801	0.000256202	0.000277552	0.000427004	0.000619155	0.000704556	0.000320253	0.000298903	0.000298903	0.000491054	0.000533755
Tyzzerella_3	4.27004e-05	0.000256202	0.000128101	4.27004e-05	0	6.40506e-05	6.40506e-05	4.27004e-05	6.40506e-05	6.40506e-05	0.000298903	8.54007e-05	0.000106751	4.27004e-05	0.000192152
Prevotellaceae_NK3B31_group	0.000533755	0.000811307	0.000341603	0.000256202	0.000234852	0.000384303	0.000320253	0.000106751	0.000234852	2.13502e-05	0.000256202	0.000149451	0.00134506	0.000298903	0.00100346
Ruminococcaceae_UCG-004	0.000192152	0.000277552	0.000192152	0.000192152	0.000298903	0.000277552	0.000427004	0.000384303	0.000298903	0.000576455	0.000256202	0.000533755	0.000277552	0.000192152	0.000555105
Anaerovibrio	0.000234852	0.000277552	0.000128101	0.000106751	6.40506e-05	0.000277552	0.000192152	0.000256202	0.000170801	0.000384303	0.000234852	0.000149451	0.000128101	0.000341603	0.000170801
Marvinbryantia	0.000469704	0.000405654	0.000533755	0.000234852	0.000918058	0.000448354	0.000854007	0.000939408	0.000960758	0.000491054	0.000234852	0.000384303	0.000320253	0.000362953	0.000362953
Ruminococcaceae_V9D2013_group	0.000192152	0.000320253	0.000149451	0.000256202	0.00168666	0.000341603	0.000341603	0.000362953	0.000555105	0.000854007	0.000234852	0.000384303	0.000149451	0.000192152	0.000469704
Succinivibrio	0.000128101	0.000320253	0.000875358	0.000234852	0.000106751	0.000213502	0.000192152	0.000298903	0.000320253	0.000128101	0.000213502	0.000234852	8.54007e-05	0.000384303	0.000106751
Coprococcus_1	0.000277552	0.000106751	0.000875358	0.000213502	0.000128101	0.000128101	0.000362953	0.000256202	0.000320253	0.000384303	0.000192152	0.000213502	0.000256202	0.000149451	0.000192152
Syntrophococcus	4.27004e-05	0.000277552	0.000128101	0.000128101	0.000106751	8.54007e-05	8.54007e-05	6.40506e-05	0.000213502	0.000106751	0.000192152	0.000128101	0.000128101	0.000170801	8.54007e-05
Anaerofustis	0.000362953	0.000277552	0.000298903	0.000277552	0.000298903	0.000298903	0.000213502	0.000170801	0.000170801	0.000320253	0.000170801	0.000619155	0.000725906	0.000170801	0.000277552
Atopobium	0.000106751	0.000256202	6.40506e-05	0.000192152	0.000277552	0.000106751	0.000619155	0.000170801	2.13502e-05	0.000341603	0.000149451	0.000128101	0.000192152	0.000149451	0.000149451
Bergeyella	2.13502e-05	0.000192152	0.000213502	8.54007e-05	0.000170801	4.27004e-05	0.000128101	8.54007e-05	0.000128101	0.000128101	0.000149451	0.000128101	0.000170801	0.000277552	0.000128101
Proteiniclasticum	0	0	0	0	0	2.13502e-05	0	2.13502e-05	4.27004e-05	0	0.000149451	0	0	0	2.13502e-05
Ruminiclostridium_6	8.54007e-05	8.54007e-05	0.000362953	0.000149451	2.13502e-05	0.000128101	0.000170801	0.000149451	0.000128101	0.000106751	0.000149451	0.000256202	0.000533755	0.000277552	0.000106751
Ruminococcaceae_UCG-001	4.27004e-05	0.000170801	4.27004e-05	0.000128101	0.000106751	8.54007e-05	6.40506e-05	8.54007e-05	0.000192152	0.000362953	0.000149451	0.000362953	0.000213502	4.27004e-05	0.000341603
Solobacterium	0.000256202	0.000106751	0.000491054	0.000576455	0.000256202	0.000213502	0.000320253	0.000832657	0.000192152	0.000256202	0.000149451	6.40506e-05	6.40506e-05	0.000277552	0.000106751
[Eubacterium]_hallii_group	6.40506e-05	6.40506e-05	0.000384303	6.40506e-05	0.000128101	4.27004e-05	8.54007e-05	0.000170801	0.000128101	0.000149451	0.000128101	2.13502e-05	0	0.000128101	0.000106751
Candidatus_Captivus	0.00219907	0.00194287	0.000277552	0.000832657	0.000405654	0.000640506	0.000491054	0.000427004	0.000213502	0.000149451	0.000128101	0.000256202	0.000192152	4.27004e-05	0.000149451
dgA-11_gut_group	2.13502e-05	2.13502e-05	0	6.40506e-05	6.40506e-05	0	0	4.27004e-05	4.27004e-05	4.27004e-05	0.000128101	0	4.27004e-05	0.000106751	4.27004e-05
hoa5-07d05_gut_group	0.000149451	6.40506e-05	0	0.000106751	6.40506e-05	0.000192152	2.13502e-05	4.27004e-05	8.54007e-05	2.13502e-05	0.000128101	8.54007e-05	0.000234852	0	8.54007e-05
unidentified_GR-WP33-58	4.27004e-05	2.13502e-05	0.000192152	6.40506e-05	0	4.27004e-05	0.000128101	0.000128101	0	4.27004e-05	0.000128101	2.13502e-05	0.000106751	0	6.40506e-05
Alloprevotella	8.54007e-05	8.54007e-05	0.00313848	2.13502e-05	8.54007e-05	6.40506e-05	0.000234852	4.27004e-05	0	2.13502e-05	0.000106751	0.000106751	0.000106751	0.000128101	0.000362953
Corynebacterium_1	0	2.13502e-05	0.000149451	0	0	0	0	0	0	4.27004e-05	0.000106751	0	0	0	0
Peredibacter	4.27004e-05	4.27004e-05	2.13502e-05	2.13502e-05	0	2.13502e-05	2.13502e-05	0	0	0	0.000106751	6.40506e-05	2.13502e-05	4.27004e-05	0
Prevotellaceae_YAB2003_group	0.000192152	0.000256202	0.000661856	0.000170801	0.000149451	0.000234852	0.000234852	0.000170801	0.000619155	0.000533755	0.000106751	0.000341603	0.000213502	0.000469704	0.000362953
Proteiniphilum	0	0	0	0	0	0	0	0	0	0	0.000106751	0	0	0	0
Tissierella	0	0	2.13502e-05	2.13502e-05	0	0	2.13502e-05	0	0	0	0.000106751	0	0	2.13502e-05	0
Bibersteinia	4.27004e-05	0.000106751	4.27004e-05	0.000149451	0.000128101	2.13502e-05	0	8.54007e-05	4.27004e-05	4.27004e-05	8.54007e-05	6.40506e-05	0.000213502	0	4.27004e-05
Clostridium_sensu_stricto_1	6.40506e-05	4.27004e-05	0.00155856	2.13502e-05	2.13502e-05	6.40506e-05	4.27004e-05	2.13502e-05	4.27004e-05	4.27004e-05	8.54007e-05	2.13502e-05	0	4.27004e-05	6.40506e-05
Desulfobulbus	0.000213502	0.000256202	0.000341603	8.54007e-05	0.000170801	0.000128101	0.000149451	0.000427004	0.000149451	0.000213502	8.54007e-05	0.000128101	0.000512404	0.000213502	0.000427004
Erysipelothrix	0	0	0	0	4.27004e-05	0	0	2.13502e-05	0	0	8.54007e-05	0	0	0	0
Fretibacterium	6.40506e-05	2.13502e-05	0.000170801	0	2.13502e-05	6.40506e-05	0	2.13502e-05	6.40506e-05	0	8.54007e-05	6.40506e-05	4.27004e-05	8.54007e-05	0.000234852
Lactobacillus	0	0	0.000982109	2.13502e-05	0	0	4.27004e-05	0	0	2.13502e-05	8.54007e-05	2.13502e-05	0	8.54007e-05	0
Oligella	0	0	6.40506e-05	0	4.27004e-05	0	0	0	2.13502e-05	2.13502e-05	8.54007e-05	0	0	0	0
Succinimonas	0.000106751	0.00397113	2.13502e-05	6.40506e-05	0.000320253	6.40506e-05	4.27004e-05	0.000704556	8.54007e-05	0.000149451	8.54007e-05	6.40506e-05	6.40506e-05	6.40506e-05	0.000106751
Acinetobacter	2.13502e-05	4.27004e-05	0.00128101	0	0	0	2.13502e-05	2.13502e-05	0	2.13502e-05	6.40506e-05	6.40506e-05	0	2.13502e-05	0
Coprococcus_2	0	2.13502e-05	0	4.27004e-05	2.13502e-05	8.54007e-05	2.13502e-05	4.27004e-05	2.13502e-05	6.40506e-05	6.40506e-05	0.000149451	0	0.000128101	4.27004e-05
Erysipelotrichaceae_UCG-009	4.27004e-05	4.27004e-05	0.000106751	0.000149451	0.000341603	0.000128101	6.40506e-05	0.000256202	0.000149451	2.13502e-05	6.40506e-05	4.27004e-05	4.27004e-05	4.27004e-05	4.27004e-05
Family_XIII_UCG-001	0	4.27004e-05	0.000106751	2.13502e-05	6.40506e-05	4.27004e-05	0	8.54007e-05	6.40506e-05	0	6.40506e-05	6.40506e-05	0	2.13502e-05	4.27004e-05
Guggenheimella	0	0	2.13502e-05	0	2.13502e-05	2.13502e-05	0	0	2.13502e-05	0	6.40506e-05	0	0	0	0
Helicobacter	0	0	8.54007e-05	0	0	0	0	0	0	0	6.40506e-05	0	0	0	0
Micrococcus	0	0	4.27004e-05	0	0	0	0	0	0	0	6.40506e-05	0	0	0	0
Olsenella	6.40506e-05	4.27004e-05	0	6.40506e-05	8.54007e-05	8.54007e-05	0.000170801	0.000128101	8.54007e-05	0.000128101	6.40506e-05	0.000192152	6.40506e-05	8.54007e-05	0.000106751
Petrimonas	0	0	0	0	0	0	0	0	0	0	6.40506e-05	0	0	0	0
Ruminiclostridium	0.000512404	0.000234852	0.000576455	0	0	2.13502e-05	6.40506e-05	4.27004e-05	6.40506e-05	8.54007e-05	6.40506e-05	6.40506e-05	0	0.000128101	0
Ruminococcaceae_UCG-009	8.54007e-05	8.54007e-05	8.54007e-05	4.27004e-05	0.000106751	8.54007e-05	8.54007e-05	2.13502e-05	0.000149451	8.54007e-05	6.40506e-05	0.000106751	8.54007e-05	0.000106751	0.000170801
Campylobacter	6.40506e-05	0.000106751	0.000234852	0.000106751	0.000106751	2.13502e-05	0.000128101	0.000128101	0.000384303	0.000106751	4.27004e-05	0.000234852	0.000128101	0.000149451	0.000170801
CPla-4_termite_group	0	0	4.27004e-05	8.54007e-05	6.40506e-05	8.54007e-05	0.000234852	0	4.27004e-05	6.40506e-05	4.27004e-05	0	0.000170801	0	0.00132371
Halomonas	6.40506e-05	0	0.00403519	0	0	0	0	0	0	0	4.27004e-05	4.27004e-05	0	0	0.000128101
Lachnospiraceae_FE2018_group	4.27004e-05	0	8.54007e-05	4.27004e-05	6.40506e-05	0.000106751	0.000128101	6.40506e-05	0.000106751	4.27004e-05	4.27004e-05	4.27004e-05	6.40506e-05	6.40506e-05	2.13502e-05
Prevotellaceae_Ga6A1_group	8.54007e-05	6.40506e-05	0.000277552	4.27004e-05	6.40506e-05	4.27004e-05	2.13502e-05	0.000192152	4.27004e-05	2.13502e-05	4.27004e-05	2.13502e-05	2.13502e-05	6.40506e-05	0.000128101
Senegalimassilia	0	0.000106751	0	0	0	0	0	2.13502e-05	4.27004e-05	2.13502e-05	4.27004e-05	0	0	2.13502e-05	6.40506e-05
Veillonellaceae_UCG-001	0	2.13502e-05	0	2.13502e-05	0	0	0	2.13502e-05	4.27004e-05	0	4.27004e-05	0	0	2.13502e-05	0.000384303
[Eubacterium]_cellulosolvens_group	0	0	4.27004e-05	2.13502e-05	0	0	0	0	0	4.27004e-05	2.13502e-05	4.27004e-05	0	0	6.40506e-05
Alysiella	0	0	0	0	6.40506e-05	0	0	0	4.27004e-05	2.13502e-05	2.13502e-05	0	4.27004e-05	0	0
Erysipelotrichaceae_UCG-008	0.000170801	0.000106751	6.40506e-05	0.000106751	6.40506e-05	6.40506e-05	0.000106751	0.000213502	2.13502e-05	8.54007e-05	2.13502e-05	0.000149451	4.27004e-05	4.27004e-05	0.000128101
Jeotgalicoccus	0	0	0	0	0	0	0	0	0	0	2.13502e-05	0	0	4.27004e-05	0
Pseudomonas	0	0	0.000128101	2.13502e-05	0	6.40506e-05	6.40506e-05	2.13502e-05	0	0	2.13502e-05	0	2.13502e-05	4.27004e-05	0
Ruminiclostridium_1	8.54007e-05	0.000106751	4.27004e-05	4.27004e-05	2.13502e-05	6.40506e-05	8.54007e-05	8.54007e-05	4.27004e-05	4.27004e-05	2.13502e-05	4.27004e-05	0	8.54007e-05	0.000256202
[Eubacterium]_brachy_group	0	4.27004e-05	0	0	2.13502e-05	2.13502e-05	2.13502e-05	0.000149451	4.27004e-05	4.27004e-05	0	0	0	4.27004e-05	0
[Ruminococcus]_gauvreauii_group	0	0	0	0	4.27004e-05	0	0	2.13502e-05	0	0	0	0	0	0	0
Acetobacter	0	0	2.13502e-05	0	0	0	0	0	0	0	0	0	0	0	0
Acidaminococcus	0	0	4.27004e-05	0	0	0	0	0	0	0	0	0	0	0	0
Actinomyces	0	0	6.40506e-05	0	0	0	0	0	0	0	0	0	0	0	0
Aeromonas	0	0	4.27004e-05	0	0	0	0	0	0	0	0	0	0	0	0
Akkermansia	0	0	0.000192152	0	0	0	0	0	0	0	0	0	0	0	0
Alistipes	0	0	0.00456894	0	0	0	0	0	0	0	0	0	0	0	0
Allisonella	0	0	0.000128101	0	0	0	0	0	0	0	0	0	0	0	0
Allobaculum	0	0	8.54007e-05	0	0	0	0	0	0	0	0	0	0	0	0
Amaricoccus	0	0	8.54007e-05	0	0	0	0	0	0	0	0	0	0	0	0
Anaerococcus	0	0	4.27004e-05	0	0	0	0	0	0	0	0	0	0	0	0
Anaerosporobacter	0	4.27004e-05	0	6.40506e-05	4.27004e-05	4.27004e-05	0	0.000128101	0.000106751	2.13502e-05	0	0.000192152	8.54007e-05	8.54007e-05	0.000192152
Anaerostipes	0	0	0.00136641	0	0	0	0	0	0	0	0	0	0	0	0
Asteroleplasma	0	0	2.13502e-05	0	0	0	0	0	6.40506e-05	4.27004e-05	0	0	0	0	0
Bacillus	0	0	0.000234852	0	0	0	0	0	0	0	0	0	2.13502e-05	0	0
Bacteroides	6.40506e-05	0	0.0316837	0	0	0	0	6.40506e-05	0	0	0	0	0	0	6.40506e-05
Barnesiella	0	0	0.00108886	0	0	0	0	0	0	0	0	0	0	0	0
Bifidobacterium	0	0	0.00102481	0	0	0	2.13502e-05	0	0	0	0	0	0	0	4.27004e-05
Bilophila	0	0	0.000384303	0	0	0	0	0	0	0	0	0	0	0	0
Blautia	2.13502e-05	0	0.00115291	4.27004e-05	4.27004e-05	0	0	2.13502e-05	0	0	0	0	0	2.13502e-05	4.27004e-05
Blvii28_wastewater-sludge_group	0	2.13502e-05	2.13502e-05	0.000128101	0	4.27004e-05	0	0	6.40506e-05	0	0	0	0.000170801	4.27004e-05	0
Bordetella	0	0	2.13502e-05	2.13502e-05	0	0	0	0	0	0	0	0	0	2.13502e-05	0
Bradyrhizobium	0	0	0.00134506	0	0	0	0	0	0	0	0	0	0	0	0
Brevibacillus	0	0	8.54007e-05	0	0	0	0	0	0	0	0	0	0	0	0
Burkholderia	0	0	4.27004e-05	0	0	0	0	0	0	0	0	0	0	0	0
Butyricimonas	0	0	0.000298903	0	0	0	0	0	0	0	0	0	0	0	0
Candidatus_Competibacter	0	0	4.27004e-05	0	0	0	0	0	0	4.27004e-05	0	0	4.27004e-05	8.54007e-05	0.000128101
Candidatus_Methanomethylophilus	0	0	0	0	0	0	4.27004e-05	0	0	0	0	0	0	0	0.000234852
Candidatus_Soleaferrea	0.000106751	0	0	0	2.13502e-05	0	2.13502e-05	0	2.13502e-05	0.000106751	0	0	0.000149451	6.40506e-05	4.27004e-05
Carnobacterium	0	0	0.000128101	4.27004e-05	0	0	0	0	0	0	0	0	0	0	0
Castellaniella	0	0	4.27004e-05	0	0	0	0	0	0	0	0	0	0	0	0
Catenibacterium	0	0	0.000427004	0	0	0	0	0	0	0	0	0	0	0	0
Catonella	0	0	6.40506e-05	0	0	0	0	0	0	0	0	0	0	0	0
Chitinimonas	0	0	2.13502e-05	0	0	0	0	0	0	0	0	0	0	0	0
Chitinophaga	0	0	4.27004e-05	0	0	0	0	0	0	0	0	0	0	0	0
Chryseobacterium	0	0	0	4.27004e-05	0	0	4.27004e-05	2.13502e-05	0	2.13502e-05	0	0	8.54007e-05	6.40506e-05	2.13502e-05
Collinsella	0	0	0.000640506	0	0	0	0	0	0	0	0	0	0	0	0
Coprobacter	0	0	0.000256202	0	0	0	0	0	0	0	0	0	0	0	0
Coprococcus_3	0	0	0.000234852	0	0	0	0	0	0	0	0	0	0	0	0
Dialister	0	0	0.0057859	0	0	0	0	0	0	0	0	0	0	0	0
Dietzia	0	0	0	0	0	0	0	0	0	0	0	0	0	0	0
Eggerthella	0	0	4.27004e-05	0	0	0	0	0	0	0	0	0	0	0	0
Enterococcus	0	0	0.000256202	0	0	0	0	0	0	0	0	0	0	0	0
Epulopiscium	0	0	0.000298903	0	0	0	0	0	0	0	0	0	0	0	0
Erysipelatoclostridium	0	0	0.000256202	0	0	0	0	0	0	0	0	0	0	0	0
Erysipelotrichaceae_UCG-003	0	0	0.00140911	0	0	0	0	0	0	0	0	0	0	0	0
Escherichia-Shigella	0	0	0.00384303	0	0	0	0	0	4.27004e-05	0	0	0	0	0	0
Eubacterium	0	0	2.13502e-05	0	0	0	0	0	0	0	0	0	0	0	0
Ezakiella	0	0	0.000192152	0	0	0	0	0	0	0	0	0	0	0	0
Facklamia	0	0	0	0	0	0	0	0	0	0	0	0	0	2.13502e-05	0
Faecalibacterium	0	0	0.00512404	0	0	0	0	0	0	0	0	0	0	0	0
Filifactor	0	0	0.000106751	0	0	0	0	0	0	0	0	0	2.13502e-05	0	0
Flavobacterium	0	2.13502e-05	2.13502e-05	0	0	0	4.27004e-05	4.27004e-05	0	0	0	0	4.27004e-05	0.000149451	0
Fusicatenibacter	0	0	0.00119561	0	0	0	0	0	0	0	0	0	0	0	0
Fusobacterium	0	0	0.00341603	0	0	0	0	0	0	0	0	0	4.27004e-05	0	0
Gemella	0	0	0.000918058	0	0	0	2.13502e-05	0	0	0	0	0	0	0	4.27004e-05
Gilliamella	0	0	2.13502e-05	0	0	0	2.13502e-05	0	0	0	0	0	0	0	0
Holdemanella	0	0	0.000192152	0	0	0	0	0	0	0	0	0	0	0	0
Holdemania	0	0	0.000128101	0	0	0	0	0	0	0	0	0	0	0	0
Hydrogenoanaerobacterium	6.40506e-05	4.27004e-05	8.54007e-05	4.27004e-05	2.13502e-05	2.13502e-05	4.27004e-05	0.000170801	4.27004e-05	8.54007e-05	0	6.40506e-05	0	4.27004e-05	6.40506e-05
Hydrogenophilus	0	0	8.54007e-05	0	0	0	0	0	0	0	0	0	0	0	0
Johnsonella	0	0	0.000341603	0	0	0	0	0	0	0	0	0	0	0	0
Lachnoclostridium	0	0	0.00345873	0	0	0	0	0	0	0	0	0	0	0	0
Lachnospira	0	0	0.00401383	0	0	0	0	0	0	0	0	0	0	0	0
Lachnospiraceae_NK4B4_group	4.27004e-05	0	0	0	0	2.13502e-05	0	2.13502e-05	8.54007e-05	4.27004e-05	0	0.000170801	0	0	0
Lachnospiraceae_UCG-001	0	0	0.000170801	0	0	0	0	0	0	0	0	0	0	0	0
Lachnospiraceae_UCG-004	0	0	0.00125966	0	0	0	0	0	0	0	0	0	0	0	0
Limnobacter	0	0	6.40506e-05	0	0	0	0	0	0	0	0	0	0	0	0
Mannheimia	0	2.13502e-05	2.13502e-05	0	0	0	4.27004e-05	0	0	0	0	0	0	0	6.40506e-05
Megamonas	0	0	0.00175072	0	0	0	0	0	0	0	0	0	0	0	0
Megasphaera	0	0	0.000320253	0	0	0	0	0	0	0	0	0	0	0	0
Methanobrevibacter	0	0	0	0	0	0	0	0	0	0	0	0	0	0	0.00241257
Methylobacterium	0	8.54007e-05	0.000918058	4.27004e-05	4.27004e-05	0	0	0	0	4.27004e-05	0	0	4.27004e-05	2.13502e-05	2.13502e-05
Microbacterium	0	0	0.000362953	0	0	0	0	0	0	0	0	0	0	0	0
Moraxella	2.13502e-05	0	0.000234852	0	6.40506e-05	2.13502e-05	6.40506e-05	4.27004e-05	8.54007e-05	2.13502e-05	0	6.40506e-05	0.000362953	4.27004e-05	0
Murdochiella	0	0	0.000256202	0	0	0	0	0	0	0	0	0	0	0	0
Neisseria	0	0	0.000298903	0	0	0	0	0	0	4.27004e-05	0	0	4.27004e-05	0	0
Niastella	0	0	4.27004e-05	0	0	0	0	0	0	0	0	0	0	0	0
Nocardioides	0	0	2.13502e-05	0	0	0	0	0	0	0	0	0	0	0	0
Novosphingobium	0	0	4.27004e-05	0	0	0	0	0	0	0	0	0	0	0	0
Odoribacter	0	0	0.000341603	0	0	0	0	0	0	0	0	0	0	0	0
Oscillospira	0	2.13502e-05	0	0	0	2.13502e-05	0	0	0	0	0	0	0	0	0
p-1088-a5_gut_group	4.27004e-05	6.40506e-05	8.54007e-05	6.40506e-05	0.000128101	6.40506e-05	2.13502e-05	0.000362953	0	0.000106751	0	2.13502e-05	0.000192152	0	0.000469704
Paenibacillus	0	0	0.000106751	0	0	0	0	0	0	0	0	0	0	0	0
Parabacteroides	0	0	0.00431274	0	0	0	0	0	0	0	0	0	0	0	0
Paraprevotella	0	0	0.00119561	0	0	0	0	0	0	0	0	0	0	0	0
Parasutterella	0	0	0.00183612	0	0	0	0	0	0	0	0	0	0	0	0
Parvimonas	0	0	0.000832657	0	0	0	0	0	0	0	0	0	0	2.13502e-05	0
Peptococcus	0	0	0.000234852	0	0	0	0	0	0	0	0	0	0	0	0
Peptoniphilus	0	0	8.54007e-05	0	0	0	0	0	0	0	0	0	0	0	0
Peptostreptococcus	0	0	0.000832657	0	0	0	0	0	0	0	0	0	0	0	0
Phascolarctobacterium	0	0	0.00119561	0	0	0	0	0	0	0	0	0	0	0	0
Planococcus	0	0	0.000149451	0	4.27004e-05	0	2.13502e-05	0	8.54007e-05	0	0	2.13502e-05	0	4.27004e-05	4.27004e-05
Porphyromonas	0	0	0	0	0	4.27004e-05	0	2.13502e-05	2.13502e-05	2.13502e-05	0	2.13502e-05	6.40506e-05	0	2.13502e-05
Prevotella	0	0	0.00437679	0	0	0	0	0	0	0	0	0	0	0	0
Prevotella_2	0	0	0.000640506	0	0	0	0	0	0	0	0	0	0	0	0
Prevotella_7	0	0	6.40506e-05	0	0	0	0	0	0	0	0	0	0	0	0
Prevotella_9	0	0	0.0119775	0	0	0	0	0	0	0	0	0	0	2.13502e-05	0
Propionibacterium	0	0	4.27004e-05	0	0	0	0	0	0	0	0	0	0	0	0
Proteus	0	0	2.13502e-05	0	0	0	0	0	0	0	0	0	0	0	0
Pyramidobacter	2.13502e-05	4.27004e-05	0	0	0	0	4.27004e-05	0	0	0	0	0	2.13502e-05	0	0.000213502
Ralstonia	0	0	4.27004e-05	0	0	0	0	0	0	0	0	2.13502e-05	0	4.27004e-05	0
Rhodobacter	0	0	2.13502e-05	0	0	0	0	0	0	0	0	0	0	0	0
Romboutsia	0	6.40506e-05	0.00123831	0	0	0	0	4.27004e-05	0	0	0	0	0	0	0
Rubrobacter	0	0	2.13502e-05	0	0	0	0	0	0	0	0	0	0	0	0
Ruminococcaceae_UCG-003	0	0	0.000597805	0	0	0	0	0	0	0	0	0	0	0	0
Saccharopolyspora	0	0	2.13502e-05	0	0	0	0	0	0	0	0	0	0	0	0
Schwartzia	0	2.13502e-05	0	0	2.13502e-05	0	0	0	0	0	0	0	0	0	0
Sharpea	0	6.40506e-05	0	0	0	0	0	0	0	0	0	0	0	0	0
Shewanella	0	6.40506e-05	0.00239122	0	0	0	0	2.13502e-05	0	0	0	0	2.13502e-05	0	6.40506e-05
Shuttleworthia	0	2.13502e-05	0	0	0	0	0	0	0	2.13502e-05	0	0	0	0	0
Singulisphaera	0	0	2.13502e-05	0	0	0	0	0	0	0	0	0	0	0	0
Sphingobacterium	2.13502e-05	0	6.40506e-05	0	0	0	0	4.27004e-05	0	0	0	0	0	8.54007e-05	0
Sphingobium	0	0	6.40506e-05	0	0	0	0	0	0	0	0	0	0	0	0
Sphingomonas	0	0	4.27004e-05	0	0	0	0	0	0	0	0	0	0	0	0
Sphingopyxis	0	0	2.13502e-05	0	0	0	0	0	0	0	0	0	0	0	0
Spirochaeta_2	4.27004e-05	0	2.13502e-05	4.27004e-05	0.000106751	2.13502e-05	8.54007e-05	0	4.27004e-05	4.27004e-05	0	6.40506e-05	4.27004e-05	2.13502e-05	2.13502e-05
Staphylococcus	0	0	0.000106751	0	0	0	0	0	0	0	0	0	0	0	0
Stenotrophomonas	0	0	0.000832657	0	0	0	0	0	0	0	0	0	0	0	0
Steroidobacter	0	0	6.40506e-05	0	0	2.13502e-05	0	0	0	0	0	0	0	0	0
Streptococcus	2.13502e-05	6.40506e-05	0.00147316	0	0.000106751	2.13502e-05	0	0	0	0	0	0	6.40506e-05	6.40506e-05	0.000149451
Subdoligranulum	0	0	0.00211367	0	0	0	0	0	0	0	0	0	0	0	0
Sutterella	0	0.000149451	0.00213502	0	0	0	0	0	0	0	0	6.40506e-05	0	0	4.27004e-05
Suttonella	0	0	6.40506e-05	0	0	0	0	0	0	0	0	0	0	0	0
Synergistes	0	0	0	0	2.13502e-05	0	0	0	2.13502e-05	0	0	4.27004e-05	2.13502e-05	0	2.13502e-05
Terrimonas	0	2.13502e-05	0	0	0	0	0	6.40506e-05	0	0	0	0	0	0	0
Tessaracoccus	0	0	0	2.13502e-05	0	0	0	0	0	0	0	0	0	0	0
Tumebacillus	0	0	8.54007e-05	0	0	0	0	0	0	0	0	0	0	0	0
Turicibacter	0	0	0.000192152	0	2.13502e-05	0	0	0	6.40506e-05	0	0	0	0	0	0
Tyzzerella	2.13502e-05	0	0	0.000106751	0	0	2.13502e-05	0	0	2.13502e-05	0	6.40506e-05	2.13502e-05	0	0
Tyzzerella_4	0	0	0.000106751	0	0	0	0	0	0	0	0	0	0	0	0
Ulvibacter	0	0	4.27004e-05	0	0	0	0	0	0	2.13502e-05	0	0	4.27004e-05	0	0
unidentified_Chloroplast	0	0	0.000192152	0	0	0	4.27004e-05	0	0	0	0	0	4.27004e-05	0	2.13502e-05
unidentified_Firmicutes	0	0	8.54007e-05	0	0	0	0	0	0	0	0	0	0	0	4.27004e-05
unidentified_Gaiellales	0	0	2.13502e-05	0	0	0	0	0	0	0	0	0	0	0	0
unidentified_Lachnospiraceae	0	0	0.000170801	0	0	0	0	0	0	0	0	0	0	0	0
unidentified_Mollicutes_RF9	0	0	0	0	0	0	0	0	8.54007e-05	0	0	6.40506e-05	0	0	0
unidentified_Nitrospiraceae	0	0	2.13502e-05	0	0	0	0	0	0	0	0	0	0	0	0
unidentified_Rhodospirillaceae	2.13502e-05	0	0	0	4.27004e-05	0	0.000128101	0.000106751	6.40506e-05	4.27004e-05	0	0	8.54007e-05	2.13502e-05	0
unidentified_Ruminococcaceae	0	0	6.40506e-05	0	0	0	0	0	0	0	0	0	0	0	0
unidentified_SAR324_clade.Marine_group_B.	0	0	2.13502e-05	0	0	0	0	0	0	0	0	0	0	0	0
unidentified_Xanthomonadaceae	0	0	0	0	0	0	0	2.13502e-05	0	0	0	0	2.13502e-05	0	0
Veillonella	0	0	0.000298903	0	0	0	0	0	0	0	0	0	0	0	0
Weissella	0	6.40506e-05	0.000448354	0	0	0	2.13502e-05	0	0	0	0	0	0	0	0

## Sheet: SILVA database
Genus	LE1	LE2	LE3	LE4	LE5	ME1	ME2	ME3	ME4	ME5	HE1	HE2	HE3	HE4	HE5
Christensenellaceae_R-7_group	0.110244	0.133084	0.117739	0.101904	0.235366	0.145894	0.199226	0.120474	0.132261	0.179388	0.170069	0.222667	0.129659	0.130749	0.100191
Rikenellaceae_RC9_gut_group	0.203985	0.177675	0.128836	0.174562	0.124411	0.206476	0.198225	0.191642	0.205876	0.166422	0.120541	0.160551	0.15717	0.234632	0.10802
Prevotella_1	0.028356	0.0314919	0.0604261	0.0391869	0.0253536	0.0602927	0.0247087	0.0172138	0.021217	0.0259763	0.0793969	0.0343608	0.069122	0.0301352	0.131483
Ruminococcaceae_NK4A214_group	0.0755938	0.068388	0.0324259	0.063473	0.0853794	0.0528423	0.0774175	0.105106	0.0646072	0.0976337	0.048461	0.0519527	0.0797305	0.0731696	0.0649853
uncultured_bacterium_o_WCHB1-41	0.0238191	0.0108754	0.0152789	0.0235744	0.0193488	0.0181923	0.0130994	0.0151232	0.0470599	0.0112757	0.0379192	0.0140779	0.0319811	0.0225514	0.0556445
uncultured_bacterium_f_F082	0.134797	0.0698559	0.130193	0.0606708	0.070145	0.0483053	0.0178365	0.013811	0.0410773	0.0493506	0.0354061	0.0384307	0.0159239	0.0279335	0.067454
Lachnospiraceae_XPB1014_group	0.0152789	0.00927409	0.00816209	0.0109198	0.00940753	0.0149008	0.0131216	0.00985233	0.00805089	0.0174139	0.0325149	0.00929633	0.00702784	0.0126768	0.00807313
SP3-e08	0.00836225	0.00896273	0.00469264	0.0251979	0.0238413	0.00451472	0.00640512	0.0154568	0.0170803	0.00369184	0.0308024	0.0156347	0.00845121	0.00967441	0.0124099
Saccharofermentans	0.0136776	0.0294013	0.017236	0.012788	0.011676	0.0179922	0.0157015	0.0185704	0.0234187	0.0234632	0.0306023	0.0160351	0.0129437	0.0149453	0.0121653
Erysipelotrichaceae_UCG-004	0.0152789	0.016769	0.00929633	0.0243528	0.022885	0.00822881	0.0258207	0.0187039	0.0147229	0.0148341	0.0211725	0.00978561	0.0355618	0.0140779	0.0239303
Prevotellaceae_UCG-003	0.0196602	0.0141891	0.0233965	0.0212615	0.0179699	0.0387199	0.0564452	0.0335602	0.0326039	0.0179477	0.0187261	0.0193933	0.0269327	0.0464371	0.0307579
Lachnospiraceae_ND3007_group	0.0126323	0.0112979	0.00404768	0.00673872	0.00535984	0.00742816	0.0100525	0.00662752	0.00582688	0.00627168	0.0161685	0.0052264	0.0070056	0.00435904	0.00473712
uncultured_bacterium_f_Bacteroidales_UCG-001	0.00713904	0.00785073	0.0225736	0.0164354	0.00960769	0.00914065	0.00487056	0.0113646	0.0123432	0.00527088	0.0159906	0.0118539	0.00373632	0.0119206	0.00718352
uncultured_bacterium_o_Mollicutes_RF39	0.0356952	0.0271995	0.0201717	0.0247976	0.0267325	0.0261987	0.0241527	0.0853349	0.0341607	0.0306245	0.0158349	0.0340272	0.026777	0.0232408	0.0128547
uncultured_bacterium_f_Bacteroidales_BS11_gut_group	0.0309136	0.0482386	0.0026688	0.0801308	0.0202162	0.0337159	0.00609376	0.0075616	0.0244195	0.0114314	0.0148118	0.0320701	0.0151899	0.0168357	0.00651632
Ruminococcaceae_UCG-010	0.0212392	0.0195045	0.0153456	0.0225291	0.0251312	0.022885	0.0247087	0.0224847	0.0242416	0.0249311	0.0134107	0.0205943	0.0168802	0.0246864	0.0151232
uncultured_bacterium_f_Clostridiales_vadinBB60_group	0.00556	0.0114314	0.00471488	0.00834001	0.00991905	0.00753936	0.00971889	0.00749488	0.00942977	0.00765056	0.0130104	0.0141002	0.0100525	0.0111422	0.00682768
Ruminococcaceae_UCG-002	0.0219731	0.025109	0.00549328	0.0324927	0.0134997	0.0214394	0.0152344	0.0222178	0.0136554	0.00971889	0.0112757	0.00845121	0.0237746	0.00782849	0.0111645
Ruminococcaceae_UCG-014	0.0157904	0.0208834	0.00702784	0.0128325	0.0251535	0.0221288	0.0130994	0.0197714	0.015657	0.0347611	0.0109421	0.0203941	0.00956321	0.0176808	0.0135219
uncultured_bacterium_f_vadinBE97	0.00153456	0.00217952	0.00398096	0.00349168	0.00204608	0.0067832	0.00487056	0.00627168	0.000845121	0.00235744	0.0109198	0.00415888	0.00651632	0.0100747	0.00435904
Flexilinea	0.00135664	0.00137888	0.00313584	0.017325	0.00137888	0.00182368	0.0015568	0.0034472	0.0023352	0.00204608	0.0108976	0.00149008	0.00776176	0.002224	0.0167467
uncultured_bacterium_f_Bacteroidales_RF16_group	0.0102749	0.0195045	0.00475936	0.00609376	0.0123877	0.00789521	0.0113202	0.0105195	0.00838449	0.0141446	0.0107419	0.00702784	0.00547104	0.00629392	0.00709456
Pseudobutyrivibrio	0.00849569	0.0036696	0.00427008	0.00475936	0.00257984	0.00318032	0.0036696	0.00375856	0.00251312	0.00580464	0.010008	0.00358064	0.00260208	0.00498176	0.00435904
[Eubacterium]_ruminantium_group	0.00253536	0.00375856	0.00391424	0.00309136	0.003336	0.00335824	0.00226848	0.00246864	0.00346944	0.00398096	0.00991905	0.00560448	0.0198603	0.00564896	0.00280224
Papillibacter	0.0064496	0.00845121	0.0114536	0.00840673	0.00947425	0.00800641	0.00813985	0.00827329	0.0102304	0.0101192	0.00987457	0.0119651	0.0048928	0.00858465	0.0190152
Butyrivibrio_2	0.00769504	0.0112979	0.00598256	0.0109421	0.00547104	0.0104306	0.00985233	0.00560448	0.00896273	0.0137666	0.00927409	0.00769504	0.00320256	0.00593808	0.00576016
Prevotellaceae_UCG-001	0.00309136	0.00329152	0.0175696	0.00291344	0.00204608	0.00331376	0.00286896	0.00304688	0.00220176	0.00302464	0.00865137	0.00260208	0.0036696	0.0021128	0.00776176
uncultured_bacterium_o_Rhodospirillales	0.0018904	0.00362512	0.00278	0.00235744	0.00173472	0.00315808	0.0018904	0.00480384	0.00318032	0.00108976	0.00796193	0.00195712	0.00418112	0.003892	0.00104528
Ruminococcus_1	0.00729472	0.00771728	0.00718352	0.00653856	0.00709456	0.00958545	0.00802865	0.00647184	0.00858465	0.0175919	0.00776176	0.00620496	0.00731696	0.00702784	0.00845121
Treponema_2	0.00142336	0.00131216	0.0031136	0.0031136	0.00102304	0.00260208	0.00280224	0.00647184	0.00237968	0.0023352	0.00765056	0.0018904	0.00969665	0.0025576	0.010097
Lachnospiraceae_NK4A136_group	0.00315808	0.00240192	0.00253536	0.00251312	0.00353616	0.0054488	0.0062272	0.00391424	0.00360288	0.00520416	0.0075616	0.00353616	0.0020016	0.0128325	0.00329152
probable_genus_10	0.00391424	0.00453696	0.0023352	0.00491504	0.00460368	0.00431456	0.0030024	0.0024464	0.00226848	0.00473712	0.00713904	0.00293568	0.0032248	0.00369184	0.0043368
[Eubacterium]_coprostanoligenes_group	0.0108086	0.0168135	0.0057824	0.0128325	0.0228183	0.017236	0.0122098	0.0134774	0.0174807	0.0137888	0.00707232	0.0214171	0.00936305	0.00867361	0.0138778
uncultured_bacterium_f_Lachnospiraceae	0.00293568	0.00418112	0.00598256	0.0031136	0.0026688	0.00418112	0.003892	0.00304688	0.00315808	0.00469264	0.0068944	0.0062272	0.0063384	0.00469264	0.00480384
Lachnospiraceae_AC2044_group	0.00504848	0.0030024	0.00813985	0.00974113	0.00691664	0.0109421	0.00687216	0.00649408	0.006116	0.00487056	0.00636064	0.00582688	0.0036696	0.00762832	0.00298016
Ruminococcaceae_UCG-013	0.0028912	0.00787297	0.00271328	0.0037808	0.0063384	0.0042256	0.0045592	0.00262432	0.00460368	0.00449248	0.0062272	0.00669424	0.00902945	0.0101859	0.00631616
Fibrobacter	0.003892	0.00373632	0.0142558	0.00449248	0.00404768	0.00829553	0.00793969	0.0113202	0.00447024	0.00131216	0.00616048	0.00291344	0.0030024	0.00602704	0.0054488
Mycoplasma	0.00204608	0.0245307	0.00048928	0.00142336	0.00760608	0.00209056	0.0225069	0.00358064	0.0240415	0.005004	0.0056712	0.00064496	0.00513744	0.0010008	0.000956321
Lachnospiraceae_UCG-009	0.00186816	0.00273552	0.00427008	0.00406992	0.00269104	0.0057824	0.00253536	0.0024464	0.0026688	0.00335824	0.00542656	0.00558224	0.00073392	0.00298016	0.00262432
uncultured_bacterium_f_Peptococcaceae	0.00458144	0.0045592	0.00547104	0.0076728	0.00858465	0.00375856	0.00813985	0.00591584	0.0102749	0.00435904	0.00524864	0.00929633	0.00829553	0.0106752	0.00584912
uncultured_bacterium_f_Marinilabiliaceae	0.00415888	0.00882929	0.00856241	0.00914065	0.00856241	0.00375856	0.00338048	0.00825105	0.0040032	0.0023352	0.00502624	0.00304688	0.00464816	0.00640512	0.0030024
Roseburia	0.00137888	0.0014456	0.00664976	0.0013344	0.000822881	0.00108976	0.00068944	0.000956321	0.0006672	0.00102304	0.00440352	0.00068944	0.00113424	0.000800641	0.00120096
Anaerovorax	0.00947425	0.00593808	0.00382528	0.00736144	0.00553776	0.00509296	0.00658304	0.00994129	0.00587136	0.00702784	0.00391424	0.00480384	0.00447024	0.00598256	0.0048928
Ruminococcaceae_UCG-005	0.00324704	0.00413664	0.00431456	0.0060048	0.00449248	0.00451472	0.00415888	0.00284672	0.00838449	0.007228	0.00371408	0.00880705	0.00391424	0.0062272	0.0103861
Others	0.00302464	0.001668	0.00120096	0.00220176	0.00380304	0.00246864	0.00262432	0.00302464	0.00278	0.00142336	0.00338048	0.0026688	0.00994129	0.00202384	0.00329152
uncultured_bacterium_o_Gastranaerophilales	0.000845121	0.0006672	0.000889601	0.00175696	0.000800641	0.0015568	0.00104528	0.00160128	0.00169024	0.00042256	0.00298016	0.00073392	0.00740592	0.00124544	0.00237968
Prevotellaceae_UCG-004	0.00169024	0.00146784	0.00386976	0.00182368	0.0012232	0.00142336	0.00193488	0.00547104	0.00464816	0.00202384	0.0028912	0.00260208	0.0174807	0.0116982	0.0040032
uncultured_bacterium_f_Muribaculaceae	0.00996353	0.015657	0.00680544	0.00320256	0.0034472	0.00458144	0.00409216	0.00604928	0.00398096	0.0176808	0.00264656	0.00340272	0.00829553	0.00558224	0.01946
uncultured_bacterium_f_p-251-o5	0.00438128	0.00231296	0.00291344	0.00169024	0.0012232	0.0018904	0.00298016	0.004448	0.00162352	0.00326928	0.00251312	0.00157904	0.00164576	0.00269104	0.00169024
uncultured_bacterium_f_Ruminococcaceae	0.00298016	0.00415888	0.00149008	0.0043368	0.0035584	0.00542656	0.0041144	0.00275776	0.0041144	0.0051152	0.00249088	0.007228	0.00293568	0.00293568	0.0043368
Ruminiclostridium_1	0.00180144	0.00502624	0.0014456	0.00524864	0.00576016	0.00384752	0.00331376	0.00280224	0.00375856	0.00273552	0.00226848	0.00671648	0.0015568	0.0017792	0.00315808
uncultured_bacterium_o_Bacteroidales	0.0010008	0.000800641	0.00382528	0.0013344	0.00073392	0.00157904	0.00507072	0.00284672	0.0018904	0.000889601	0.00217952	0.00440352	0.00640512	0.00113424	0.0025576
U29-B03	0.00180144	0.00173472	0.00071168	0.00193488	0.001112	0.00705008	0.00302464	0.00369184	0.00273552	0.00137888	0.00217952	0.00326928	0.0296682	0.0159906	0.0172805
Ruminococcaceae_UCG-012	0.00115648	0.00102304	0.000867361	0.00184592	0.00215728	0.00249088	0.00106752	0.00104528	0.00171248	0.00106752	0.00213504	0.003336	0.0018904	0.00257984	0.00153456
Family_XIII_AD3011_group	0.00587136	0.00398096	0.00206832	0.0051152	0.0041144	0.00293568	0.0067832	0.00427008	0.003892	0.00353616	0.0021128	0.00349168	0.00229072	0.00520416	0.00246864
uncultured_bacterium_o_OPB56	0.00015568	4.448e-05	0	4.448e-05	0.00017792	2.224e-05	0.00013344	0.00013344	6.672e-05	0.00013344	0.00204608	2.224e-05	4.448e-05	4.448e-05	2.224e-05
Lachnospiraceae_NK3A20_group	0.00160128	0.0017792	0.00108976	0.00291344	0.00157904	0.00160128	0.00184592	0.00186816	0.00140112	0.0036696	0.0018904	0.00146784	0.00224624	0.00182368	0.00173472
uncultured_bacterium_f_Victivallaceae	0.0012232	0.00035584	0.00157904	0.000867361	0.00104528	0.000845121	0.000845121	0.00106752	0.0015568	0.00064496	0.00184592	0.0010008	0.0007784	0.00231296	0.00064496
Anaeroplasma	0.00115648	0.000889601	0.00024464	0.0007784	0.00048928	0.00204608	0.00115648	0.0015568	0.000911841	0.0010008	0.00180144	0.00113424	0.00042256	0.000822881	0.00068944
Ruminococcus_2	0.00220176	0.00346944	0.0034472	0.00197936	0.003336	0.00242416	0.00191264	0.00117872	0.00291344	0.00740592	0.00173472	0.007784	0.00442576	0.00180144	0.0136554
uncultured_bacterium_f_Erysipelotrichaceae	0.00280224	0.00278	0.00195712	0.00275776	0.00220176	0.00191264	0.003336	0.00380304	0.00260208	0.00398096	0.00169024	0.00507072	0.0107197	0.00404768	0.00431456
Succiniclasticum	0.00113424	0.00126768	0.00313584	0.00518192	0.00140112	0.00151232	0.0026688	0.00409216	0.00151232	0.00186816	0.001668	0.000911841	0.00560448	0.00135664	0.0106085
Lachnospiraceae_UCG-008	0.00157904	0.00157904	0.00073392	0.00131216	0.000889601	0.0010008	0.00117872	0.00169024	0.00131216	0.00164576	0.00149008	0.00115648	0.00157904	0.000845121	0.00162352
Lachnospiraceae_UCG-006	0.00313584	0.00215728	0.00128992	0.00180144	0.00193488	0.00220176	0.00291344	0.00202384	0.00382528	0.00262432	0.00137888	0.00229072	0.00229072	0.00137888	0.00193488
Ruminobacter	0.00046704	0.00031136	0.0002224	0.0007784	0.00137888	0.00113424	0.0012232	0.00126768	0.0010008	0.00042256	0.00135664	0.000934081	0.00060048	0.00273552	0.00242416
Mogibacterium	0.00137888	0.00202384	0.00242416	0.00373632	0.00128992	0.00184592	0.00240192	0.00260208	0.0010008	0.00180144	0.00128992	0.00126768	0.00293568	0.00202384	0.00113424
uncultured_bacterium_o_Izimaplasmatales	0.00117872	0.0007784	0.00042256	0.00104528	0.00073392	0.0035584	0.00113424	0.00162352	0.00391424	0.00053376	0.00115648	0.00286896	0.00068944	0.000978561	0.00102304
uncultured_bacterium_o_Rickettsiales	0.0012232	0.00104528	0.00073392	0.000956321	0.00393648	0.00151232	0.00071168	0.006672	0.0017792	0.00146784	0.001112	0.00217952	0.0004448	0.00108976	0.000889601
Moryella	0.0013344	0.00140112	0.00028912	0.00042256	0.00040032	0.00051152	0.000800641	0.00068944	0.00075616	0.00142336	0.001112	0.00053376	0.00131216	0.00131216	0.00135664
Atopostipes	0.00013344	0.0001112	0.0001112	2.224e-05	6.672e-05	6.672e-05	6.672e-05	6.672e-05	6.672e-05	0.00013344	0.00108976	0.00026688	0.00013344	8.89601e-05	8.89601e-05
CAG-352	0.00040032	0.0003336	6.672e-05	0.0001112	0.00035584	0.00017792	0.0001112	0.00017792	0.00028912	0.00037808	0.00106752	0.00048928	0.00037808	0.00026688	0.0007784
[Eubacterium]_nodatum_group	0.00160128	0.00291344	0.00473712	0.00175696	0.00149008	0.00149008	0.00146784	0.00273552	0.00164576	0.00324704	0.00104528	0.00186816	0.0010008	0.00338048	0.000934081
Lachnospiraceae_FCS020_group	0.00046704	0.00035584	0.00128992	0.00048928	0.00048928	0.000556	0.000911841	0.00048928	0.000889601	0.00042256	0.0010008	0.000889601	0.00020016	0.00053376	0.000556
Ruminiclostridium_9	0.00042256	0.00062272	0.00026688	0.000889601	0.00057824	0.00053376	0.00071168	0.00037808	0.00638288	0.00209056	0.000956321	0.00108976	0.00062272	0.000800641	0.00053376
Sphaerochaeta	0.00024464	0.000845121	0.00120096	0.00073392	0.00053376	0.000556	0.00046704	0.00040032	0.00048928	0.00057824	0.000934081	0.00026688	0.00057824	0.00037808	0.00068944
uncultured_bacterium_f_CAP-aah99b04	0.000867361	0.00057824	2.224e-05	0.00046704	0.00028912	0.00015568	0.0001112	0.00224624	0.00042256	0.00064496	0.000911841	0.00031136	0.00398096	0.000911841	0.00024464
[Anaerorhabdus]_furcosa_group	0.00153456	0.00115648	0.00026688	0.000889601	0.001668	0.00131216	0.00146784	0.00231296	0.00102304	0.00128992	0.000867361	0.00140112	0.0028912	0.00113424	0.00204608
[Eubacterium]_xylanophilum_group	0.00013344	0.00042256	8.89601e-05	0.00024464	0.00062272	0.00048928	0.00053376	0.00035584	0.00124544	0.00108976	0.000867361	0.0012232	0.0002224	0.00115648	0.0004448
uncultured_bacterium_o_LD1-PB3	0.00160128	0.000822881	0.00246864	0.006672	0.0030024	0.00149008	0.00315808	0.00104528	0.00224624	0.00624944	0.000800641	0.0128102	0.00064496	0.00482608	0.00447024
[Eubacterium]_oxidoreducens_group	0.0010008	0.00071168	0.00151232	0.00048928	0.000911841	0.000889601	0.00048928	0.000911841	0.00153456	0.00140112	0.00075616	0.00275776	0.0003336	0.00204608	0.00102304
Oribacterium	0.000956321	0.00102304	0.00060048	0.000800641	0.00060048	0.00108976	0.00064496	0.00057824	0.00060048	0.000889601	0.00071168	0.00062272	0.0006672	0.000934081	0.0007784
Lachnospiraceae_UCG-002	0.00108976	0.000867361	0.00106752	0.000800641	0.00068944	0.000800641	0.000934081	0.00068944	0.00104528	0.00115648	0.00071168	0.00060048	0.000822881	0.000956321	0.000845121
Succinivibrionaceae_UCG-002	0.000934081	0.00057824	0.00064496	0.0004448	0.00024464	0.00291344	0.0004448	0.00053376	0.00042256	0.00380304	0.00068944	0.00684992	0.00169024	0.0004448	0.000889601
uncultured_bacterium_f_Prevotellaceae	0.00024464	0.00015568	0.0002224	0.00037808	0.0001112	0.0003336	0.00040032	0.0007784	0.00020016	0.0001112	0.00060048	8.89601e-05	0.000934081	0.000556	0.0010008
Lachnospiraceae_UCG-010	0.000845121	0.0010008	0.000934081	0.00075616	0.000956321	0.00060048	0.001112	0.000934081	0.000867361	0.000978561	0.00057824	0.000934081	0.00068944	0.00062272	0.00060048
Lachnoclostridium_10	0.00126768	0.00048928	0.00042256	0.000800641	0.00120096	0.00269104	0.000800641	0.0108976	0.00162352	0.00075616	0.00057824	0.00071168	0.00026688	0.0006672	0.00051152
Sediminispirochaeta	0.00024464	0.00031136	0.00015568	0.0003336	0.00028912	0.0002224	0.00024464	0.00026688	0.00046704	0.00028912	0.00057824	0.000556	0.00028912	0.00017792	0.00071168
[Eubacterium]_ventriosum_group	0.00062272	0.00026688	0.000800641	0.00015568	0.00040032	0.001112	0.00053376	0.00068944	0.0004448	0.00060048	0.000556	0.00146784	0.00424784	0.0003336	0.000845121
uncultured_bacterium_c_MVP-15	0.00035584	0.00031136	2.224e-05	8.89601e-05	0.00031136	0.0001112	6.672e-05	6.672e-05	0.00015568	8.89601e-05	0.000556	0.000934081	0.000956321	0.00053376	0.00020016
uncultured_bacterium_f_Marinifilaceae	0.0002224	6.672e-05	0.0003336	0.00020016	0.00015568	0.00020016	0.0002224	0.00015568	0.00040032	0.00035584	0.000556	0.00031136	8.89601e-05	0.00015568	0.00037808
uncultured_bacterium_f_Christensenellaceae	0.00046704	0.0006672	0.00068944	0.00048928	0.00046704	0.0004448	0.000556	0.00068944	0.00062272	0.00068944	0.00053376	0.000556	0.00126768	0.0007784	0.00073392
Lachnoclostridium_1	0.00042256	0.00040032	0.00040032	0.0003336	0.00015568	0.00024464	0.00046704	0.00071168	0.00037808	0.00028912	0.00053376	0.00015568	0.00202384	0.00031136	0.0006672
uncultured_bacterium_o_NED5E9	0.00046704	0.00028912	8.89601e-05	0.00060048	0.00031136	0.00053376	0.00028912	0.00102304	0.0004448	0.00053376	0.00048928	0.00035584	0.00013344	0.00028912	0.00035584
uncultured_bacterium_o_SAR324_cladeMarine_group_B	0.000934081	0.00013344	0.0001112	0.00042256	0.00024464	0.00064496	0.000956321	0.00137888	0.0013344	0.00057824	0.00046704	0.00026688	0.000556	0.00035584	0.00057824
Ruminococcaceae_V9D2013_group	0.00040032	0.0006672	0.00060048	0.00042256	0.00184592	0.00046704	0.00064496	0.0006672	0.000934081	0.000978561	0.00042256	0.000889601	0.00024464	0.00037808	0.0007784
Defluviitaleaceae_UCG-011	0.00057824	0.000800641	0.000556	0.00062272	0.00075616	0.00053376	0.000956321	0.00193488	0.0007784	0.0006672	0.00040032	0.00062272	0.00028912	0.00128992	0.00042256
Elusimicrobium	0.00013344	0.00037808	0.0004448	0.00064496	0.0003336	0.00013344	0.00102304	0.000911841	0.00037808	0.00037808	0.00040032	0.00037808	0.0040032	0.00017792	0.00017792
Selenomonas_1	0.00051152	0.00175696	0.0003336	0.00037808	0.00017792	0.00024464	0.00026688	0.00037808	0.00062272	0.00064496	0.00040032	0.00024464	0.00028912	0.00053376	0.000556
Quinella	4.448e-05	4.448e-05	0	0.00051152	8.89601e-05	0.000556	8.89601e-05	0.00013344	0.0001112	8.89601e-05	0.00037808	4.448e-05	0.0001112	0.0001112	0.00073392
Candidatus_Saccharimonas	0.00017792	0.0007784	0.00064496	0.00073392	0.000956321	0.000934081	0.00120096	0.00031136	0.00053376	0.00173472	0.00035584	0.000867361	0.000800641	0.000556	0.000556
uncultured_bacterium_f_Pedosphaeraceae	0.0003336	4.448e-05	0.00046704	0.000934081	0.0001112	0.00035584	0.0001112	0.0010008	0.00106752	0.00017792	0.00035584	0.00035584	0.00117872	0.00024464	0.00031136
Prevotellaceae_NK3B31_group	0.000556	0.00062272	0.00013344	0.00028912	0.00015568	0.00040032	0.0002224	0.0001112	0.00028912	4.448e-05	0.00031136	0.00013344	0.00128992	0.00028912	0.000911841
uncultured_bacterium_f_PeH15	0.00182368	0.0023352	0.00013344	0.00068944	0.00068944	0.00073392	0.00040032	0.00062272	0.0020016	0.00182368	0.00026688	0.0012232	0.00013344	0.00035584	0.00053376
Marvinbryantia	0.00048928	0.00035584	0.00051152	0.00028912	0.000956321	0.00053376	0.0007784	0.000911841	0.0012232	0.00035584	0.00026688	0.00037808	0.00042256	0.0004448	0.00037808
Acetitomaculum	0.00060048	0.00071168	0.00060048	0.000934081	0.00040032	0.000867361	0.00068944	0.0006672	0.00042256	0.00142336	0.00026688	0.0003336	0.0002224	0.00062272	0.00057824
Syntrophococcus	8.89601e-05	0.00020016	0.00037808	0.0002224	0.00013344	0.00017792	0.00020016	0.00013344	0.00024464	0.00020016	0.00026688	0.00017792	0.00020016	4.448e-05	0.0001112
uncultured_bacterium_f_Bacteroidetes_BD2-2	0.0002224	0.00037808	0.000889601	0.00035584	0.00024464	0.00037808	0.00046704	0.00028912	0.00040032	0.0004448	0.00024464	0.00046704	4.448e-05	0.00062272	0.0002224
Anaerovibrio	0.00026688	0.00028912	0.00013344	8.89601e-05	4.448e-05	0.00026688	0.00017792	0.00026688	0.00017792	0.0003336	0.00024464	0.0001112	0.00015568	0.00031136	0.00015568
Tyzzerella_3	4.448e-05	0	0	6.672e-05	0	0	8.89601e-05	4.448e-05	4.448e-05	6.672e-05	0.00024464	4.448e-05	4.448e-05	2.224e-05	0.00017792
Ruminococcaceae_UCG-004	0.00015568	0.0002224	0.00026688	0.0002224	0.00031136	0.00026688	0.00046704	0.0003336	0.0003336	0.00060048	0.0002224	0.00048928	0.00031136	0.00020016	0.00064496
uncultured_bacterium_f_Succinivibrionaceae	0.00013344	0.00031136	0.00104528	0.00015568	8.89601e-05	0.00017792	0.00020016	0.0003336	0.00028912	0.00017792	0.0002224	0.00017792	8.89601e-05	0.0003336	0.00013344
Mailhella	0.00024464	6.672e-05	8.89601e-05	0.00037808	0.00031136	0.00020016	0.00031136	0.00035584	0.00020016	0.00013344	0.0002224	8.89601e-05	0.00042256	0.0001112	0.00017792
Psychrobacter	4.448e-05	4.448e-05	4.448e-05	0	0.0001112	2.224e-05	0.0001112	0.00015568	4.448e-05	2.224e-05	0.0002224	6.672e-05	0.00020016	0.000556	2.224e-05
uncultured_bacterium_f_Planococcaceae	0.00028912	0.00031136	0.00048928	0.00048928	0.00073392	0.00024464	0.00113424	0.0002224	0.00051152	0.00053376	0.00020016	0.0010008	0.00320256	0.0024464	0.00162352
Candidatus_Endomicrobium	0.00020016	8.89601e-05	0.00035584	0.0001112	0.0001112	0.00031136	0.00026688	0.00060048	0.0002224	0.0001112	0.00020016	0.00040032	0.00120096	6.672e-05	0.00040032
Clostridiales_bacterium_canine_oral_taxon_162	0.00013344	0.0002224	0.00017792	0.00026688	0.00017792	8.89601e-05	0.00015568	0.00017792	0.00026688	0.0002224	0.00017792	0.00013344	0.0003336	0.00020016	0.0001112
Solobacterium	0.00017792	8.89601e-05	0.00028912	0.00057824	0.00020016	0.00013344	0.00035584	0.000822881	0.00020016	0.00017792	0.00017792	8.89601e-05	6.672e-05	0.00013344	8.89601e-05
Victivallis	0.00013344	0.00020016	0.00042256	0.00031136	0.0001112	0.00013344	0.00013344	8.89601e-05	0.00020016	6.672e-05	0.00017792	8.89601e-05	0.00024464	6.672e-05	6.672e-05
Anaerofustis	0.00028912	0.00020016	0.00037808	0.00028912	0.0003336	0.00031136	0.0002224	0.00020016	0.00015568	0.00035584	0.00015568	0.00060048	0.0006672	0.0002224	0.00026688
[Eubacterium]_brachy_group	0.0001112	0.00017792	0.0002224	0.0001112	0.00020016	2.224e-05	0.00017792	0.00042256	0.00026688	0.00028912	0.00015568	0.0001112	0.0006672	0.00031136	0.00020016
Atopobium	8.89601e-05	0.00020016	6.672e-05	0.00013344	0.00015568	8.89601e-05	0.00051152	0	2.224e-05	0.00028912	0.00015568	0.0001112	0.0001112	8.89601e-05	8.89601e-05
Clostridium_sensu_stricto_1	0.00015568	0.0001112	0.00146784	0.00015568	0.00020016	6.672e-05	4.448e-05	0.0002224	0.0002224	0.00020016	0.00015568	6.672e-05	6.672e-05	0.00037808	6.672e-05
Ruminiclostridium	0.00051152	0.00040032	6.672e-05	0.00040032	0.00031136	0.000556	0.00031136	0.0001112	0.00042256	0.00040032	0.00013344	0.00053376	0.00020016	0.00042256	0.0003336
Prevotellaceae_YAB2003_group	0.00013344	0.00026688	0.000800641	0.00015568	0.00015568	0.00024464	0.00024464	0.00017792	0.00064496	0.00057824	0.00013344	0.00028912	0.00020016	0.00053376	0.00031136
Ruminiclostridium_6	8.89601e-05	6.672e-05	4.448e-05	8.89601e-05	4.448e-05	0.00015568	8.89601e-05	0.00013344	0.00013344	0	0.00013344	0.00020016	0.0004448	0.00028912	8.89601e-05
Desulfuromonas	0.00028912	0.00024464	4.448e-05	0.00015568	0.00028912	0.0001112	0.00024464	0.00024464	0.0002224	0.00013344	0.00013344	0.00015568	0.0002224	0.00026688	0.00015568
Desulfobulbus	0.00017792	0.0003336	0.0003336	0.00013344	0.00015568	0.00015568	6.672e-05	0.0004448	0.00020016	0.00017792	0.00013344	0.00015568	0.00064496	0.00020016	0.00042256
Bergeyella	2.224e-05	8.89601e-05	0.00020016	6.672e-05	0.00020016	2.224e-05	4.448e-05	4.448e-05	2.224e-05	6.672e-05	0.00013344	0.0001112	4.448e-05	0.00015568	6.672e-05
Syntrophomonas	0.0001112	8.89601e-05	6.672e-05	8.89601e-05	8.89601e-05	0.00013344	8.89601e-05	8.89601e-05	6.672e-05	0.00013344	0.00013344	6.672e-05	0.00017792	0.00020016	4.448e-05
uncultured_bacterium_f_Neisseriaceae	8.89601e-05	0.0001112	0.00015568	6.672e-05	0.00015568	0	6.672e-05	0.0001112	0.00013344	8.89601e-05	0.00013344	4.448e-05	0.00017792	0.0002224	0.000556
bacterium_P201	0.00037808	0.00115648	0.00146784	0.00026688	0.0001112	0.00028912	0.00035584	0.00015568	0.00035584	0.000934081	0.0001112	0.00151232	0.00017792	0.000978561	0.00186816
Alloprevotella	8.89601e-05	0.00020016	0.00315808	0.00013344	0.00026688	0.0002224	0.0002224	6.672e-05	6.672e-05	8.89601e-05	0.0001112	0.00017792	8.89601e-05	0.00015568	0.00120096
uncultured_bacterium_o_Absconditabacteriales_SR1	2.224e-05	0.00015568	0.00117872	0.00046704	0.00020016	0.0007784	0.00024464	0.00075616	0.00017792	0.00075616	0.0001112	0.0001112	8.89601e-05	0.00031136	0.00020016
Succinimonas	0.0001112	0.00418112	0	6.672e-05	0.00028912	6.672e-05	6.672e-05	0.00068944	6.672e-05	0.00017792	0.0001112	8.89601e-05	6.672e-05	8.89601e-05	0.0001112
Bibersteinia	2.224e-05	6.672e-05	0	0.00013344	0.0001112	2.224e-05	0	6.672e-05	4.448e-05	2.224e-05	0.0001112	8.89601e-05	0.00026688	0	2.224e-05
Agathobacter	0.00020016	8.89601e-05	0.0130994	8.89601e-05	0.00026688	0.000800641	0.00020016	0.00017792	0.00042256	0.00031136	8.89601e-05	0.002224	0.00013344	0.00020016	0.00017792
Ruminococcaceae_UCG-001	6.672e-05	8.89601e-05	2.224e-05	0.00015568	0.00013344	0.00013344	0.0001112	0.0001112	0.00017792	0.00026688	8.89601e-05	0.00037808	0.00020016	0.00024464	0.00046704
Olsenella	6.672e-05	6.672e-05	0	2.224e-05	8.89601e-05	8.89601e-05	0.00020016	8.89601e-05	8.89601e-05	0.0001112	8.89601e-05	0.00017792	4.448e-05	6.672e-05	0.0001112
uncultured_bacterium_f_Paracaedibacteraceae	0.00193488	0.00149008	0.00020016	0.00013344	0.00017792	0.0003336	0.00031136	0.00035584	8.89601e-05	6.672e-05	8.89601e-05	0.00015568	0.00013344	6.672e-05	8.89601e-05
Methylobacterium	8.89601e-05	0.0001112	0.005004	4.448e-05	6.672e-05	6.672e-05	4.448e-05	0	8.89601e-05	2.224e-05	8.89601e-05	6.672e-05	6.672e-05	8.89601e-05	6.672e-05
Ruminococcaceae_UCG-011	8.89601e-05	4.448e-05	8.89601e-05	0.00024464	0.0001112	0.00031136	0.00013344	0.0001112	2.224e-05	0.00015568	8.89601e-05	6.672e-05	2.224e-05	0.00151232	0.00017792
uncultured_bacterium_f_Oligoflexaceae	0.00015568	0.000911841	6.672e-05	8.89601e-05	0.00013344	8.89601e-05	0.00113424	0.0004448	0.0001112	0.00013344	8.89601e-05	4.448e-05	4.448e-05	8.89601e-05	4.448e-05
uncultured_rumen_bacterium	4.448e-05	2.224e-05	4.448e-05	0	0	2.224e-05	0.00013344	0	0.00020016	2.224e-05	8.89601e-05	2.224e-05	0.00013344	0.00013344	0
Campylobacter	6.672e-05	8.89601e-05	2.224e-05	8.89601e-05	0.00013344	2.224e-05	0.00013344	0.00013344	0.00037808	0.0001112	6.672e-05	0.0002224	0.00013344	0.00013344	0.00020016
uncultured_bacterium_f_Paludibacteraceae	0.00013344	0.00026688	0.00013344	0.00015568	0.00015568	0.00017792	0.00013344	0.0003336	0.00024464	0.00013344	6.672e-05	0.00020016	6.672e-05	0.00015568	0.0002224
uncultured_bacterium_f_Puniceicoccaceae	0.00048928	4.448e-05	2.224e-05	0.0003336	4.448e-05	2.224e-05	8.89601e-05	0.00013344	8.89601e-05	0.00013344	6.672e-05	0.00017792	2.224e-05	4.448e-05	8.89601e-05
uncultured_bacterium_o_PB19	0.0002224	2.224e-05	0.0003336	0.00031136	0.00035584	2.224e-05	4.448e-05	0.0003336	0.00051152	0.00013344	6.672e-05	0.00013344	2.224e-05	0.0003336	6.672e-05
Fretibacterium	0	0.00042256	4.448e-05	0	2.224e-05	6.672e-05	4.448e-05	0	6.672e-05	0.00013344	6.672e-05	0.00013344	2.224e-05	0.0001112	0.0001112
Coprococcus_1	0.00020016	0.0001112	8.89601e-05	0.00013344	8.89601e-05	2.224e-05	0.00017792	0.00013344	0.00026688	0.00017792	6.672e-05	8.89601e-05	0.0001112	8.89601e-05	0
uncultured_bacterium_o_Lineage_IV	4.448e-05	0	0	0.0001112	0	0.00017792	2.224e-05	2.224e-05	0	0	6.672e-05	4.448e-05	0	4.448e-05	0.000800641
Halomonas	4.448e-05	0	0.00429232	0	0	0	0	2.224e-05	0	2.224e-05	6.672e-05	2.224e-05	2.224e-05	0	0.00013344
Erysipelotrichaceae_UCG-008	0.00017792	0.00015568	2.224e-05	0.00013344	8.89601e-05	6.672e-05	6.672e-05	0.00020016	4.448e-05	8.89601e-05	4.448e-05	0.00015568	0	6.672e-05	0.00013344
[Eubacterium]_saphenum_group	0.0001112	2.224e-05	4.448e-05	8.89601e-05	0.0001112	4.448e-05	4.448e-05	4.448e-05	4.448e-05	8.89601e-05	4.448e-05	8.89601e-05	0	2.224e-05	4.448e-05
uncultured_bacterium_f_Synergistaceae	8.89601e-05	4.448e-05	0.0002224	0.00013344	0.00013344	0.0001112	0.00040032	0.0001112	0.00020016	0.00020016	4.448e-05	6.672e-05	0.0002224	0.00013344	0.0001112
Lachnospiraceae_FE2018_group	4.448e-05	0	8.89601e-05	6.672e-05	6.672e-05	8.89601e-05	0.0001112	4.448e-05	8.89601e-05	4.448e-05	4.448e-05	6.672e-05	6.672e-05	8.89601e-05	2.224e-05
Prevotellaceae_Ga6A1_group	8.89601e-05	4.448e-05	0.00035584	4.448e-05	4.448e-05	4.448e-05	2.224e-05	0.00020016	2.224e-05	2.224e-05	4.448e-05	4.448e-05	2.224e-05	8.89601e-05	0.0001112
Acinetobacter	2.224e-05	2.224e-05	0.00051152	0	0	0	2.224e-05	2.224e-05	0	2.224e-05	4.448e-05	4.448e-05	0	4.448e-05	0
uncultured_bacterium_f_0319-6G20	0.00013344	0.0001112	6.672e-05	0.00015568	0.00015568	0.0001112	0.0002224	0.0002224	0.00015568	6.672e-05	4.448e-05	2.224e-05	0.0006672	2.224e-05	8.89601e-05
M2PT2-76_termite_group	6.672e-05	4.448e-05	0	0.00015568	0	0.00020016	0.00013344	4.448e-05	2.224e-05	0	4.448e-05	2.224e-05	4.448e-05	0	4.448e-05
uncultured_bacterium_f_M2PB4-65_termite_group	0.00017792	0.0001112	0	0.0001112	0.00020016	6.672e-05	0	0	0.00017792	2.224e-05	4.448e-05	0	0	4.448e-05	2.224e-05
Desulfovibrio	2.224e-05	0.0001112	0.00013344	2.224e-05	4.448e-05	0.0002224	0.00015568	4.448e-05	4.448e-05	0.0001112	2.224e-05	0.00020016	0.00015568	4.448e-05	0.00017792
Ruminococcaceae_UCG-009	6.672e-05	4.448e-05	4.448e-05	0	6.672e-05	6.672e-05	4.448e-05	0	6.672e-05	0.0001112	2.224e-05	0.00013344	4.448e-05	6.672e-05	0.00020016
uncultured_bacterium_f_Amoebophilaceae	4.448e-05	2.224e-05	4.448e-05	2.224e-05	8.89601e-05	2.224e-05	0.00026688	0.00073392	6.672e-05	4.448e-05	2.224e-05	0.0001112	6.672e-05	2.224e-05	2.224e-05
uncultured_bacterium_f_Bacteroidetes_vadinHA17	0.00015568	4.448e-05	0.0002224	0	6.672e-05	6.672e-05	8.89601e-05	2.224e-05	4.448e-05	2.224e-05	2.224e-05	4.448e-05	2.224e-05	0.000934081	2.224e-05
CPla-4_termite_group	0	0	6.672e-05	6.672e-05	8.89601e-05	8.89601e-05	0.00024464	0	6.672e-05	0	2.224e-05	0	0.00017792	0	0.0013344
uncultured_bacterium_f_Peptostreptococcaceae	0	2.224e-05	0.00117872	0	0	0	0	2.224e-05	0	2.224e-05	2.224e-05	0	0	0	2.224e-05
GCA-900066575	0	0	6.672e-05	2.224e-05	0	4.448e-05	2.224e-05	6.672e-05	4.448e-05	0.0001112	0	0.0001112	0.0001112	2.224e-05	0.0001112
Pirellula	0.00017792	2.224e-05	0.00013344	2.224e-05	2.224e-05	0	8.89601e-05	2.224e-05	4.448e-05	0.00024464	0	6.672e-05	4.448e-05	4.448e-05	0.0001112
uncultured_bacterium_o_Bradymonadales	2.224e-05	6.672e-05	8.89601e-05	0.00013344	0.00013344	6.672e-05	0.00013344	0.00017792	8.89601e-05	4.448e-05	0	4.448e-05	0.00017792	2.224e-05	0.00028912
Erysipelotrichaceae_UCG-009	6.672e-05	2.224e-05	6.672e-05	0.00015568	0.00040032	0.00013344	6.672e-05	0.00020016	0.00020016	2.224e-05	0	2.224e-05	2.224e-05	4.448e-05	4.448e-05
Streptococcus	2.224e-05	2.224e-05	0.00151232	0	2.224e-05	0	0	0	0	0	0	2.224e-05	2.224e-05	0	2.224e-05
[Ruminococcus]_torques_group	6.672e-05	0	0.00153456	0	0	0	4.448e-05	2.224e-05	0	2.224e-05	0	0	0	0	0
Bacteroides	2.224e-05	0	0.0321146	0	0	0	0	0	0	0	0	0	0	0	4.448e-05
Escherichia-Shigella	2.224e-05	2.224e-05	0.00373632	0	0	0	0	0	4.448e-05	0	0	0	0	2.224e-05	0
Fusobacterium	2.224e-05	0	0.00302464	0	0	0	0	0	0	0	0	0	0	0	0
Haemophilus	2.224e-05	0	0.00306912	0	2.224e-05	0	0	2.224e-05	2.224e-05	0	0	0	2.224e-05	6.672e-05	0
p-1088-a5_gut_group	2.224e-05	2.224e-05	2.224e-05	8.89601e-05	6.672e-05	4.448e-05	4.448e-05	0.00031136	0	6.672e-05	0	0	0.0002224	0	6.672e-05
Alistipes	0	0	0.00429232	0	0	0	0	2.224e-05	0	0	0	0	0	0	0
Anaerostipes	0	0	0.00153456	0	0	0	0	0	0	0	0	0	0	0	0
Barnesiella	0	0	0.0012232	0	0	0	0	0	0	0	0	0	0	0	0
Bifidobacterium	0	0	0.00102304	0	0	0	2.224e-05	0	0	0	0	0	0	0	2.224e-05
Blautia	0	0	0.00142336	0	0	0	0	0	0	0	0	0	0	0	0
Bradyrhizobium	0	0	0.00131216	0	0	0	0	0	0	0	0	0	0	0	0
Collinsella	0	0	0.00062272	0	0	0	0	0	0	0	0	0	0	0	0
Coprococcus_2	0	0	0.0006672	0	0	0	0	0	0	0	0	0	0	0	0
Dialister	0	0	0.00542656	0	0	0	0	0	0	0	0	0	0	0	0
Dorea	0	0	0.00071168	0	0	0	0	0	0	0	0	0	0	0	0
Erysipelotrichaceae_UCG-003	0	0	0.00146784	0	0	0	0	0	0	0	0	0	0	0	0
Faecalibacterium	0	0	0.00549328	0	0	0	0	0	0	0	0	0	0	0	0
Fusicatenibacter	0	0	0.0012232	0	0	0	0	0	0	0	0	0	0	0	0
Gemella	0	2.224e-05	0.000800641	0	0	0	0	0	0	0	0	0	0	0	2.224e-05
Lachnoclostridium	0	0	0.00128992	0	0	0	0	0	0	0	0	0	0	0	0
Lachnospira	0	0	0.00438128	0	0	0	0	0	0	0	0	0	0	0	0
Lachnospiraceae_NC2004_group	0	0	0.00175696	0	0	0	0	0	0	2.224e-05	0	0	0	0	0
Lachnospiraceae_UCG-004	0	0	0.00124544	0	0	0	0	0	0	0	0	0	0	0	0
Megamonas	0	0	0.00182368	0	0	0	0	0	0	0	0	0	0	0	0
Methanobrevibacter	0	0	0	0	0	0	0	0	0	0	0	0	0	0	0.0025576
Pantoea	0	0	0.00128992	0	0	0	0	2.224e-05	0	0	0	0	0	0	0
Parabacteroides	0	0	0.00440352	0	0	0	0	2.224e-05	0	0	0	0	0	0	0
Paraprevotella	0	0	0.00062272	0	0	0	0	0	0	0	0	0	0	0	0
Parasutterella	0	0	0.00206832	0	0	0	0	0	0	0	0	0	0	0	0
Parvimonas	0	0	0.0010008	0	0	0	0	0	0	0	0	0	0	2.224e-05	0
Peptostreptococcus	0	0	0.0010008	0	0	0	0	0	0	0	0	0	0	0	0
Phascolarctobacterium	0	0	0.000889601	0	0	0	0	0	0	0	0	0	0	0	0
Prevotella	0	0	0.00495952	0	0	0	0	0	0	0	0	0	0	0	0
Prevotella_2	0	0	0.00064496	0	0	0	0	0	0	0	0	0	0	0	0
Prevotella_9	0	0	0.0122542	0	0	0	0	0	0	0	0	0	0	2.224e-05	0
Shewanella	0	4.448e-05	0.0023352	0	0	0	0	2.224e-05	0	0	0	0	2.224e-05	0	6.672e-05
Stenotrophomonas	0	0	0.000845121	0	0	0	0	0	0	0	0	0	2.224e-05	0	0
Subdoligranulum	0	0	0.00217952	0	0	0	0	0	0	0	0	0	0	0	0
Sutterella	0	0	0.00191264	0	0	0	0	0	0	0	0	0	0	0	2.224e-05
